# Supplementary material
Source: MDPI journal article supplement (https://www.mdpi.com/2410-3888/7/1/29)
Supplement: s1 [file s1]

# Identification and characterization of immunoglobulin T heavy chain in large yellow croaker (*Larimichthys crocea*)

**Yan Teng<sup>1</sup>, Qiuling Fu<sup>1,2</sup>, Yuanzhen Tan<sup>1</sup>, Yangyang Ding<sup>1</sup>, Yang Ding<sup>1</sup> and Xinhua Chen<sup>1,3,\*</sup>**

<sup>1</sup> Key Laboratory of Marine Biotechnology of Fujian Province, Institute of Oceanology, Fujian Agriculture and Forestry University, Fuzhou, 350002, China

<sup>2</sup> Institute of Animal Husbandry and Veterinary Medicine of Fujian Academy of Agricultural Sciences, Fuzhou 350013, China

<sup>3</sup> Southern Marine Science and Engineering Guangdong Laboratory (Zhuhai), Zhuhai, 519000, China Yan Teng and Qiuling Fu contributed equally to this work.

\* Correspondence: 15 Shangxiadian Road, Fuzhou 350002, Fujian, China. E-mail address: chenxinhua@tio.org.cn (X. Chen)

[illegible]

**Figure S1.** Nucleotide and deduced amino acid sequences of *LcIgT* gene (GenBank accession number: MW450786.1) The *LcIgT* sequence possesses a  $V_H$  and three  $C_H$  regions indicated with arrow. The putative typical polyadenylation signal sequence (AATAAA) is marked with underline. The signal peptide sequence is in red and grey shadow. The conserved cysteines (C) are denoted by

**Table S1.** Primers used for gene cloning in this study.

| Primers                 | Sequence (5'-3')                             | Primers Information |
|-------------------------|----------------------------------------------|---------------------|
| IgT-3'RACE Inner-F IgT- | GCAAGCAACTTCTTCCCAAAT CAGTCACCGTAACTTCAGAACA | RACE-PCR            |
| 3'RACE Outer-FIgT-      | GATCAGAATCAAAGGAGCCAGTTA                     | RACE-PCR            |
| 5'RACE Inner-RIgT-      | ACACACCAGTGTCTGAGTGTCTCCTCTTGGATGATGGACT     | RACE-PCR            |
| 5'RACE Outer-RIgT-ORF-  | ATAGGACAGGACTGCTGC                           | RACE-PCR            |
| F                       | CTAACGGCATTCTAACGCGTTACCATGG                 | cloningcloning      |
| IgT-ORF-R               | ACGTTGACATTGAACCAACCAAATC                    | qPCR qPCR           |
| IgT-qFIgT-qR            | ACGTTGACATTGAACCAACCAAATC                    |                     |
